# Supplementary material
Source: PubMed Central journal article supplement (PMC5124099)
Supplement: rspb20161972supp1.pdf [file rspb20161972supp1.pdf]

# Multivariate female preference tests reveal latent perceptual biases

D. A. Gray, E. Gabel, T. Blankers and R. M. Hennig

## Supplemental Materials: 4 Figures

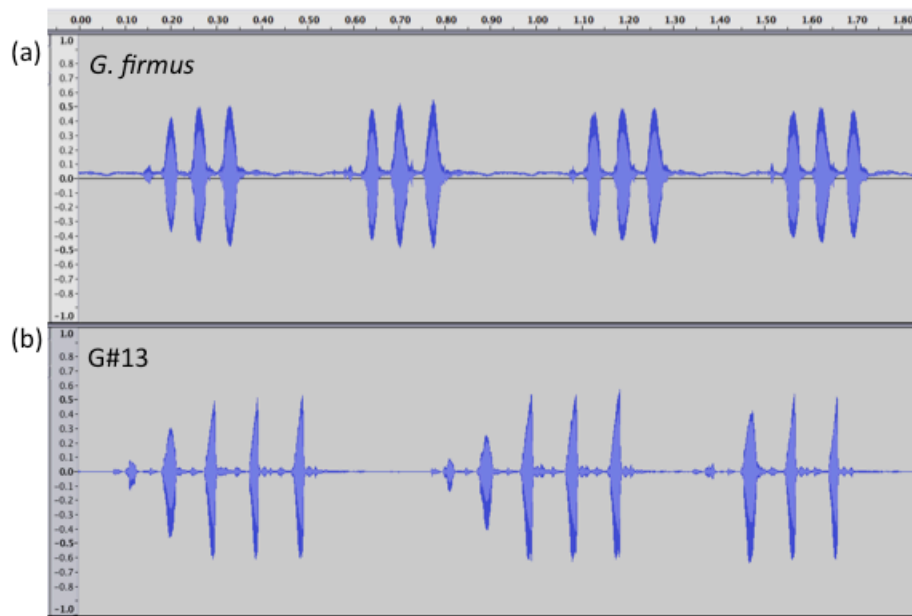

**Figure S1. Waveform of representative *G. firmus* (Fig. S1A) and G#13 (Fig. S1B) songs at ~25 °C. Timescale is the same for both, ca. 1.8 seconds, and is indicated above the figure.**

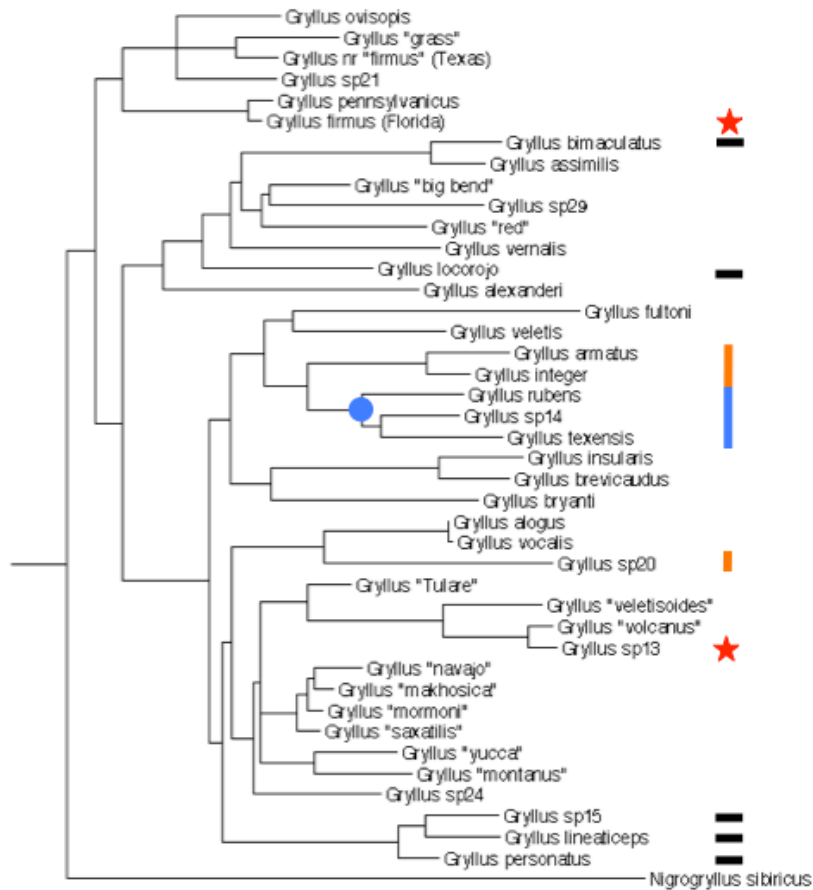

**Figure S2. Preliminary phylogeny of *Gryllus* field crickets based on sequences of the nuclear *ribosomal Internal Transcribed Spacer 2* region (DA Gray, DB Weissman, JA Cole, unpublished). All of the species shown are chirping species, except *G. texensis*, *G. rubens*, and *G. sp14*, which are true trilling species [indicated by a blue bar (tips) and a blue dot (shared ancestral node)], and *G. armatus*, *G. integer*, and *G. sp20* (indicated by orange bars) which are described as having “stutter-trills” – essentially chirps concatenated into trills. The phylogenetic distribution of male chirps and trills suggests that chirps are ancestral within *Gryllus*. The phylogenetic distribution of female responses to chirps and trills is much less densely sampled, precluding a definitive analysis, but of 7 chirping species tested, 5 do not respond well to trills (indicated by horizontal black bars), whereas the two species studied here (indicated with red stars) do respond strongly to trills.**

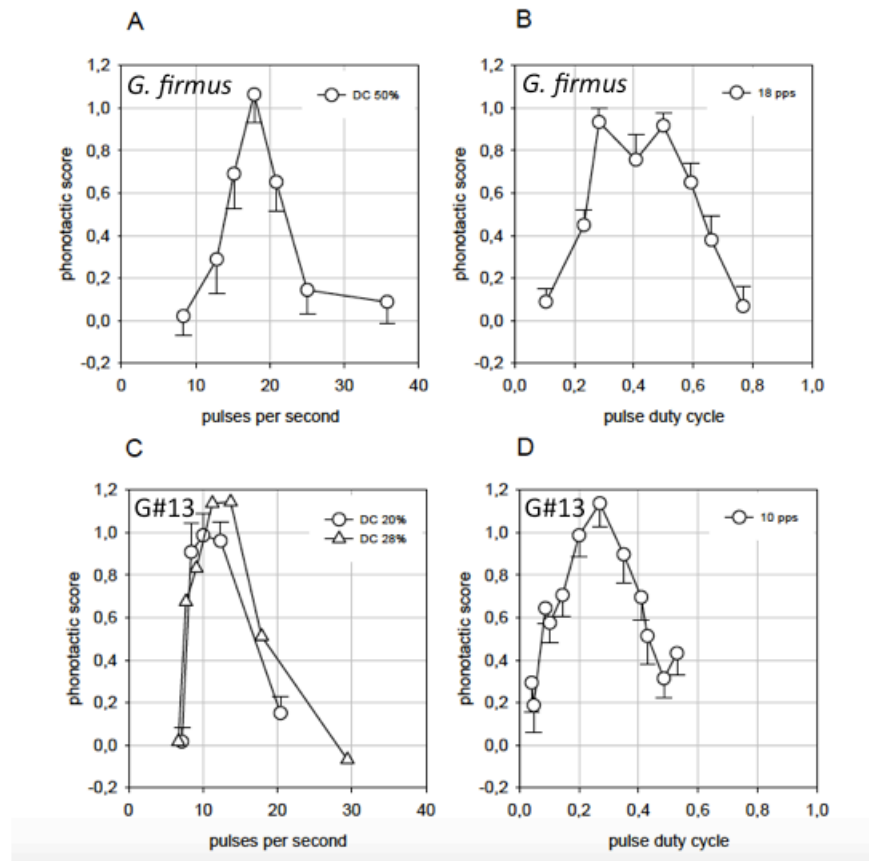

**Figure S3. Pulse profiles presented as univariate preference functions for pulse rate (Fig. S3A,C) and pulse duty cycle (Fig. S3B,D) for *G. firmus* (A,B) and G#13 (C,D).**

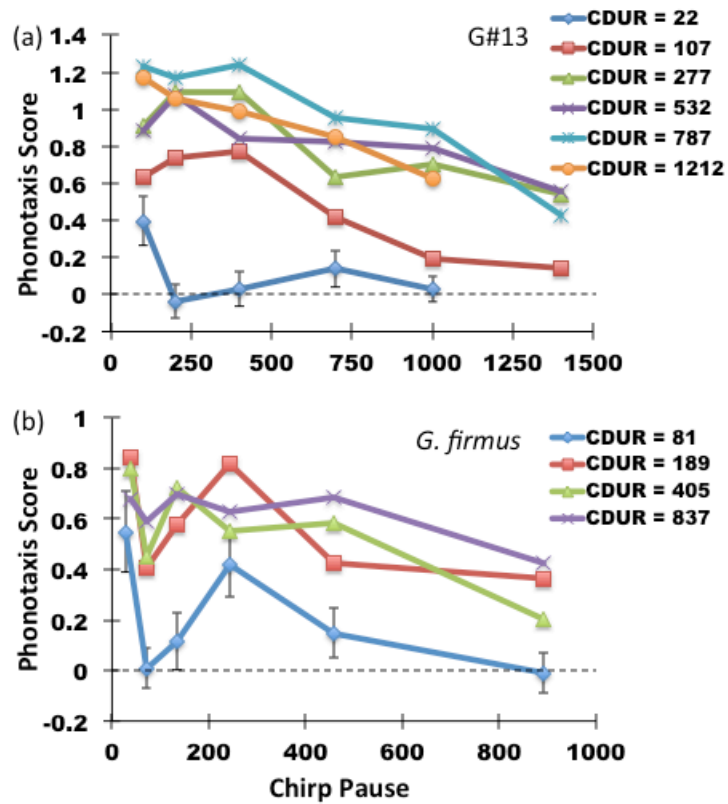

**Figure S4. Decomposition of Figs. 3B,D into univariate preference functions showing independent effects of chirp duration (CDUR) and chirp pause for G#13 (Fig. S4A) and *G. firmus* (Fig. S4B). Longer chirp durations and shorter chirp pauses both increase female response.**
